# Supplementary material for: Distributed context-dependent choice information in mouse posterior cortex
Source: PubMed Central journal article supplement (PMC9837177; doi:10.1038/s41467-023-35824-6), 2023-01-12
Supplement: 41467_2023_35824_MOESM1_ESM.pdf [file 41467_2023_35824_MOESM1_ESM.pdf]

## Supplementary Figures

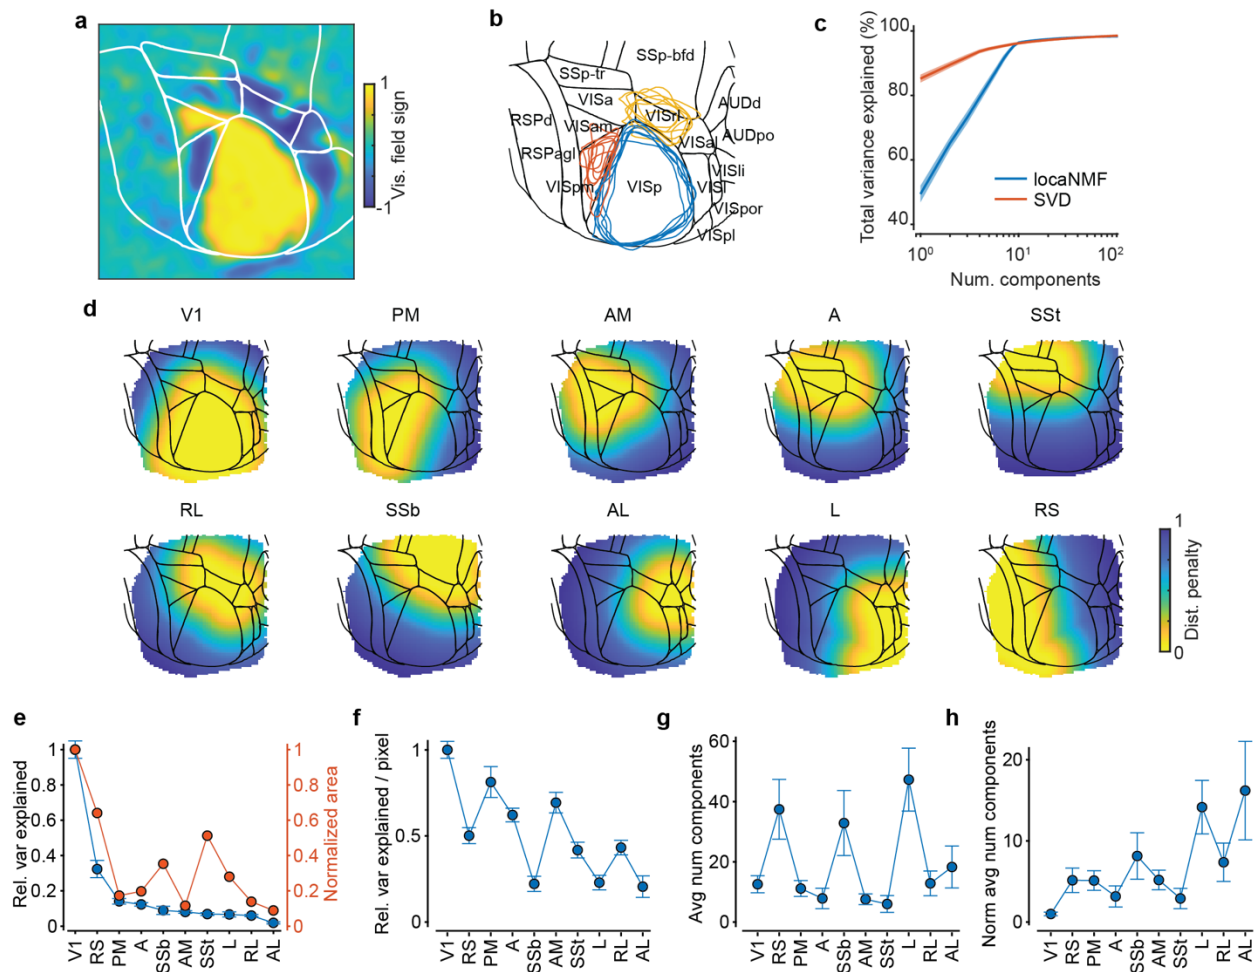

1 **Supplementary Figure 1** | **a**, Left: Representative example of the visual field sign from a retinotopy  
 2 experiment used to identify visual areas. Right: Superposition of retinotopically aligned animals (blue, red,  
 3 and yellow contours) with the Allen Brain Atlas. **b**, Pixel-wise distance penalty maps used to initialize the  
 4 ten regions for the locaNMF decomposition. Penalties within the boundaries of each region were 0 and  
 5 increased exponentially with distance from the boundary. **c**, Total variance explained as a function of the  
 6 number of components for locaNMF and standard singular-value decomposition (SVD) averaged across  
 7 animals ( $n = 7$ , line for mean and shaded area for its s.e.). **d**, Blue = relative variance explained with respect  
 8 to V1 for each of the areas ordered by their variance explained. Red = surface areas relative to V1. **e**,  
 9 Fraction of the total variance explained by the locaNMF components from each region normalized by the  
 10 number of pixels in each region. **f**, Number of components required in each area to reach 99% of total EV,  
 11 averaged across animals. This number does not simply reflect area sizes; for instance, L decomposition  
 12 resulted in many components in all animals despite being a small region. **g**, Average number of  
 13 components as in **f**, normalized by the size of each region. **e-h** Error bars denote mean and its s.e. across  
 14 animals ( $n = 7$  animals).

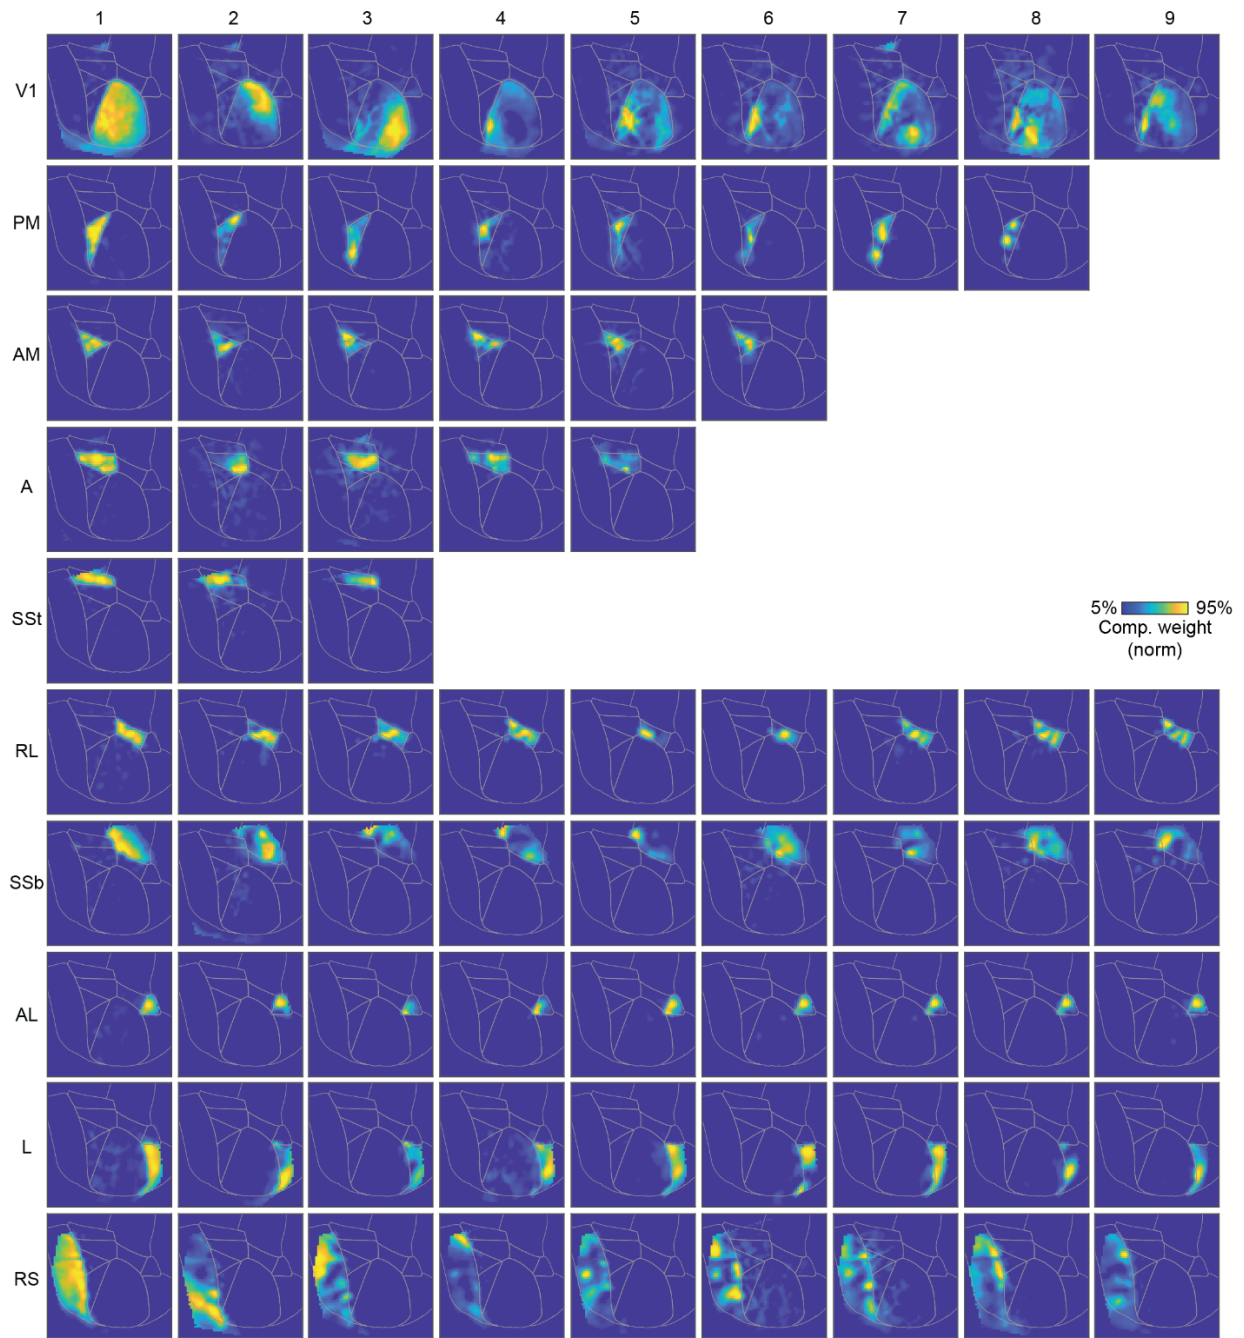

15

16 **Supplementary Figure 2** | Example locaNMF for a given animal showing the top 9 components across

17 each area. Each component color code is independently normalized relative to its maximum pixel-weight.

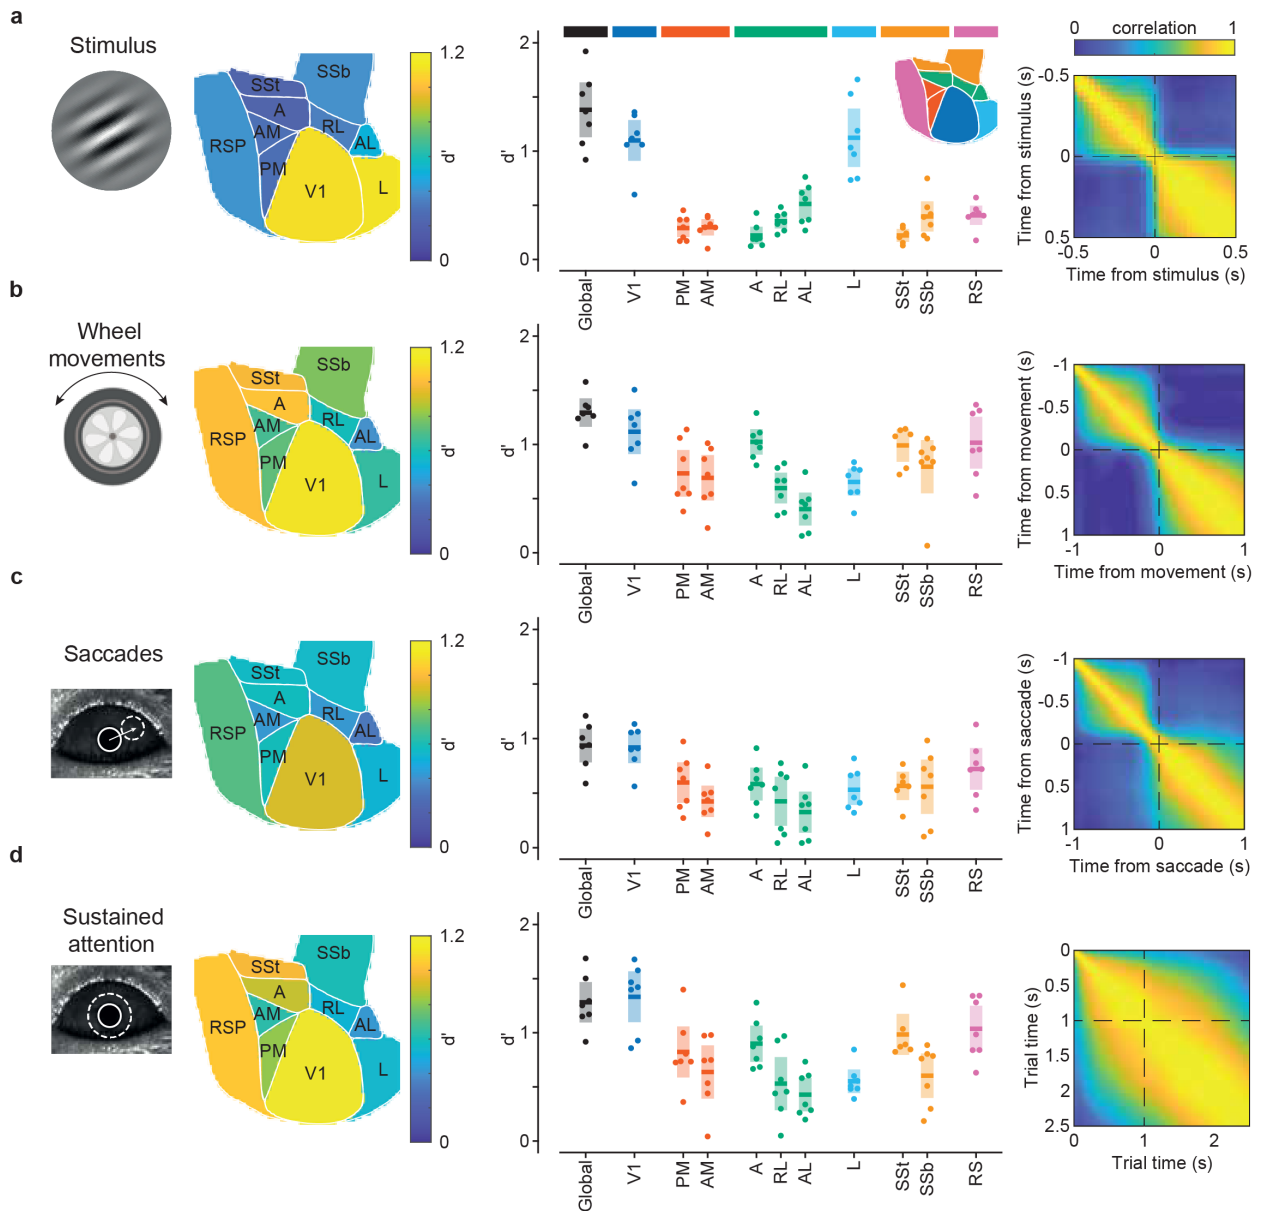

18

19 **Supplementary Figure 3 | a**, Average stimulus discriminability  $d'$  for each area. Middle: Statistics for  $d'$   
 20 values considering all areas together (global), and for each individual area across animals. Dots are  
 21 different animals; middle lines and shaded areas are means and their 95% CI ( $n = 7$  animals). Inset: color-  
 22 code reference for each of the areas. Right: Stability of the stimulus state axis in time for a representative  
 23 animal. **b-d**, same as in **a**, for wheel movements, saccades, and sustained attention.

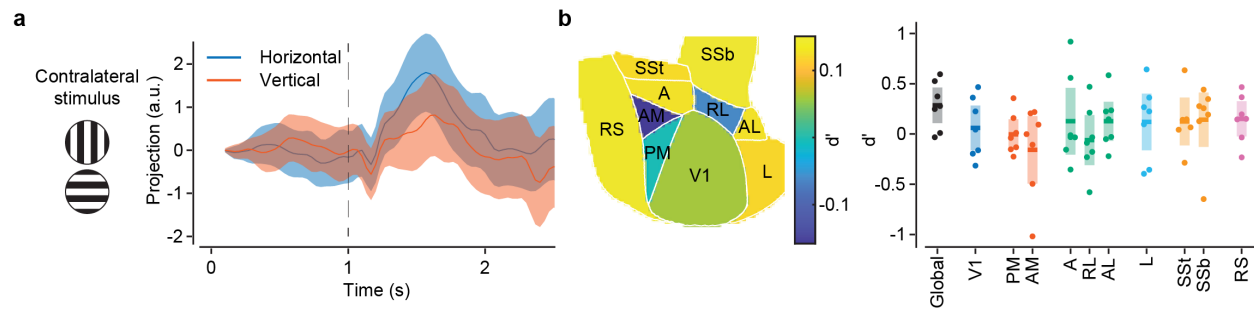

24

25 **Supplementary Figure 4 | a**, Widefield activity contained no information about the contralateral stimulus

26 orientation. Time dependence of response projections onto a state axis defined using horizontal or

27 vertical contralateral stimulus trials for a representative animal. Trajectories did not split during the trial.

28 The line is the trial average, and shaded areas are its 95% CI for a representative animal. **b**, Statistics for

29 global and area-specific  $d'$  for the same state-vector. All area-based  $d'$  values were consistent with no

30 discriminability power. Dots are different animals; middle lines and shaded areas are means and their 95%

31 CI (n = 7 animals).

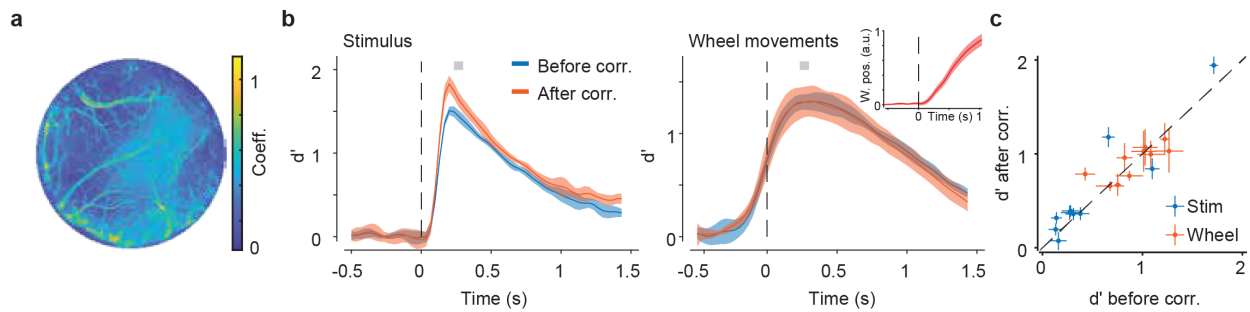

32

33 **Supplementary Figure 5 | a**, Hemodynamic correction. Hemodynamic correction had limited impact on  
 34 state axes definitions and discriminability values. Spatial map of linear coefficients of the hemodynamic  
 35 correction fit (see Methods) for a given animal. Coefficients only became substantial ( $> 0.5$ ) on top of the  
 36 largest blood vessels. **b**, Comparison of  $d'$  values for stimulus (left) and wheel (right) movement detection  
 37 (line for trial average and shaded area for its 95% CI). Hemodynamic correction slightly increased  $d'$  values  
 38 for stimulus detection at stimulus onset time, but the overall curves for wheel movements remained  
 39 unchanged (Inset: Wheel position profile for the wheel movements used in the figure). **c**, Scatter plot of  
 40  $d'$  values for each of the 10 cortical areas before and after hemodynamic correction for stimulus and wheel  
 41 movements state axes. For most of the areas, all pairs fell at the diagonal, denoting similar  $d'$  scores ( $n =$   
 42 10 retinotopic areas). Linear correlation values between hemodynamic corrected and uncorrected  $d'$   
 43 values were 0.93 and 0.79 for stimulus and wheel movements respectively). Each point shows the average  
 44  $d'$  and the error bar its standard deviation across the 5 cross-validation folds.

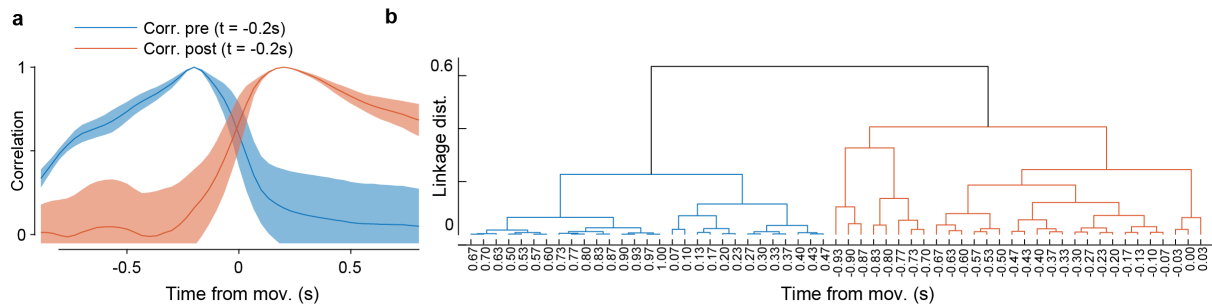

45  
 46 **Supplementary Figure 6 | a**, Cross-section of the cross-correlogram from Supplementary Fig. 2b for pre-  
 47 and post-movement state axes, defined at ~200 ms before and after movement onset, i.e., at times when  
 48 correlation values  $r = 1$  in the blue and orange curve, respectively. Correlation values remain large within  
 49 the pre- and post-movement periods, with correlations quickly dropping to near zero values in the “other”  
 50 time interval (positive times for the blue line, and negative for the orange; lines and shaded regions are  
 51 mean and s.e. of the cross-correlogram averaged across  $n = 7$  animals). **b**, Hierarchical clustering (average  
 52 linkage with correlation metric) of the movement state axis defined in pre- and post-movement time  
 53 intervals for a given animal. State axes cluster in two large groups corresponding to pre- and post-  
 54 movement onset (marked by the sign change). Only the first two frames post movement belong to the  
 55 pre-movement cluster, and this is due to the moving window used to average the data when defining the  
 56 state vectors (Methods).

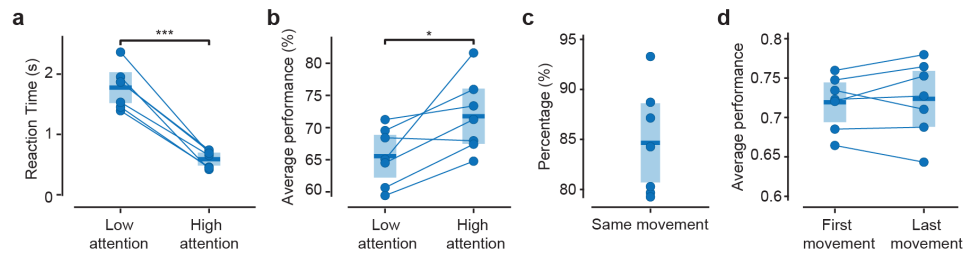

57  
 58 **Supplementary Figure 7 | a**, Reaction times for the first movement depended on attention, being  
 59 significantly shorter in high attention trials (paired two-sided  $t$ -test,  $p = 4 \times 10^{-5}$ ). **b**, Average performance  
 60 was consistently higher in high-attention trials (paired two-sided  $t$ -test,  $p = 0.02$ ). **c**, Fraction of  
 61 occurrences when the direction of the first wheel movement coincided with the direction of the last  
 62 movement in the trial (i.e., the movement that ended the trial). **d**, Comparison of overall performance  
 63 when considering either the first or the last movement (paired two-sided  $t$ -test,  $p = 0.8$ ). In all panels, a  
 64 dot indicates one animal; the middle bar and shaded area are the average across animals and 95% CI. In  
 65 all panels, a dot indicates one animal; the middle bar and shaded area are the average across animals and  
 66 95% CI ( $n = 7$  animals). Lines join data from the same animal.

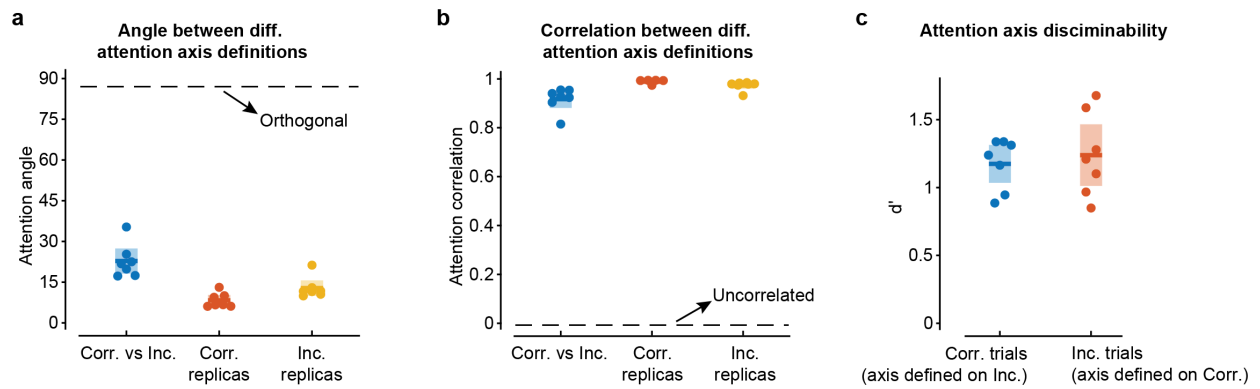

67

68

69

70

71

72

73

74

75

76

77

**Supplementary Figure 8 | a**, Angle between the state axes for sustained attention defined using either correct or incorrect trials. The angle resulting from the same state axes defined across different replicas (folds in the cross-validation procedure) are also shown for comparison for both correct and incorrect definitions. Dashed line: average angle for orthogonal axes (85.5°, obtained by resampling the components in one of the axes). **b**, Pearson correlation values for the same state axes comparisons done in **a**. Dashed line: average angle for uncorrelated axes ( $r = 0.02$ , obtained by resampling the components in one of the axes). **c**, Discriminability values obtained when discriminating attention states from correct trials using their projections onto the state axis defined with incorrect trials and vice versa. High discriminability values are maintained in both cases. In all panels, a dot indicates one animal; the middle bar and shaded area are the average across animals and 95% CI ( $n = 7$  animals).



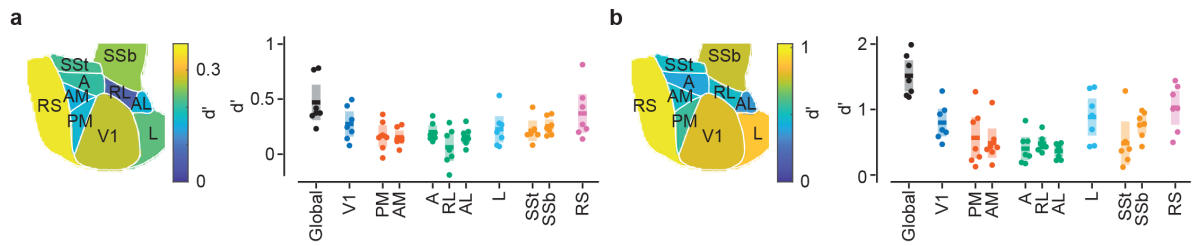

78

79 **Supplementary Figure 9 | a**, Area-specific  $d'$  contributions to choice before movement onset ( $t = -0.1$  s).

80 Global and area-based  $d'$  statistics for the choice state axis according to movement time (Figure 3 main

81 text). **b**, As in (a), but after movement onset ( $t = 0.3$  s). In all panels, a dot indicates one animal; the middle

82 bar and shaded area are the average across animals and 95% CI ( $n = 7$  animals).

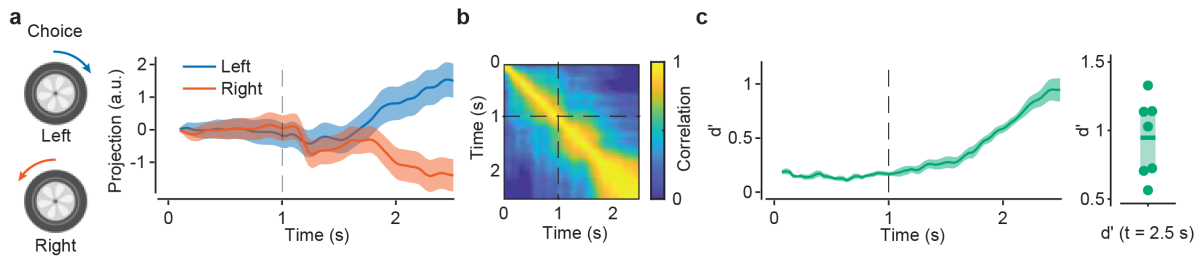

83

84 **Supplementary Figure 10 | a**, Choice signals can be distinguished in trial time. Projections onto the state  
 85 axis for choice defined according to trial-time—not movement time— for a representative animal. Only  
 86 trials in which the first movement appeared in the 1.5 to 2.5 s window were included. Trajectories started  
 87 to split within the same window (line for trial average and shaded area for its 95% CI). **b**, Stability of the  
 88 choice state axis in trial time. A first signature of stability appears soon after stimulus onset. **c**, Global  $d'$   
 89 evolution for the same state axis averaged across animals (left,  $n = 7$ , line for mean and shaded area for  
 90 its s.e.), and statistics of peak values (right; each dot is one animal, middle bar and shaded area are the  
 91 average across animals and 95% CI  $n = 7$  animals).  $d'$  starts to increase immediately after stimulus onset  
 92 and before movement onset.

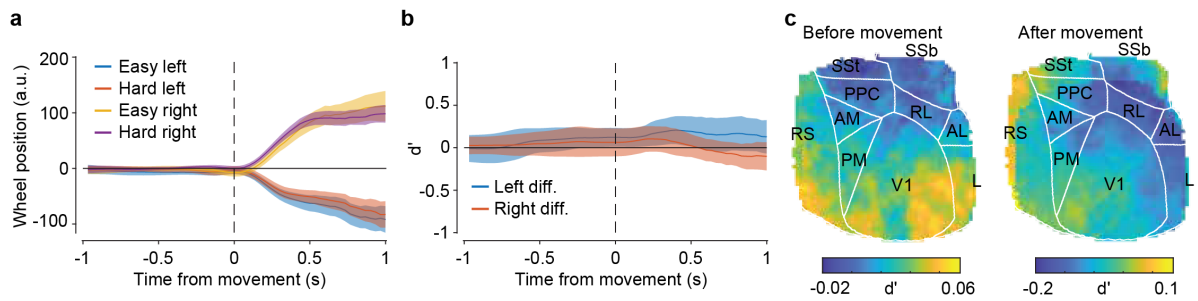

93  
94  
95  
96  
97  
98  
99  
100  
101  
102  
103  
104

**Supplementary Figure 11 | a**, Choice-related wheel movements were independent of difficulty. Wheel position trajectories, aligned to movement time, separated for easy ( $< 30$  deg ) and hard ( $> 60$  deg ) trials for left and right choices for a representative animal (line for trial average and shaded area for its 95% CI). **b**,  $d'$  discriminability values between easy and hard wheel position trajectories for left and right choices. The  $d'$  values stayed near 0, indicating no large differences between wheel position trajectories with difficulty ( $n = 7$ , line for mean and shaded area for its s.e.). **c**, pixel-wise choice decoding. Choice  $d'$  values computed with the activity of each pixel (local) in cortical space before ( $t = -0.1$  s) and after ( $t = 0.1$  s) movement onset. The  $d'$  values were substantially lower than those obtained from locaNMF components and state axes projections. None of the pixel  $d'$  values before movement differed significantly from baseline ( $p = 0.05$  used as threshold, two-sided  $t$ -test without multiple comparisons correction, smallest  $p$ -value = 0.48).

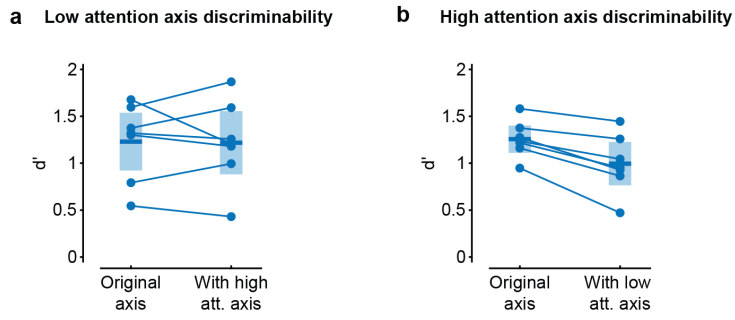

105

106 **Supplementary Figure 12 | a**, Stability of choice axis with attention. Left: discriminability of choice in low  
 107 attention trials using the state axis defined in low attention states. Right: using the axis defined on high  
 108 attention state trials instead. **b**, Same as in (a), but discriminating high attention trials instead. In all panels,  
 109 a dot indicates one animal; the middle bar and shaded area are the average across animals and 95% CI (n  
 110 = 7 animals).

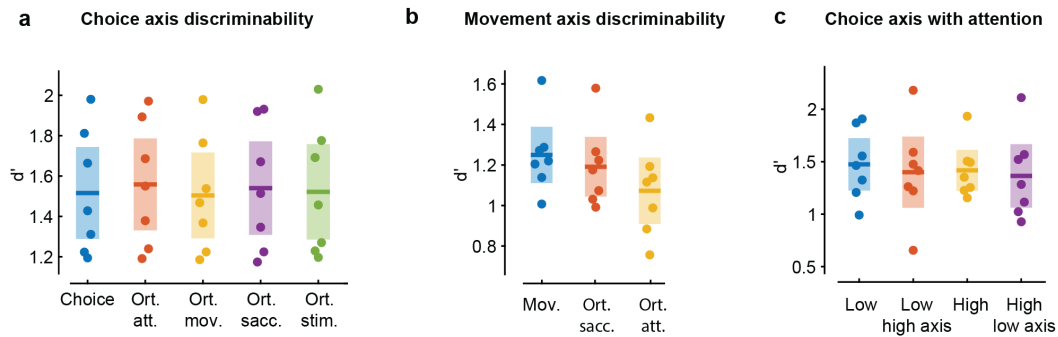

111

112 **Supplementary Figure 13 | a**, Stability of choice axis discriminability with other task and behavior  
 113 variables. Leftmost: discriminability of the original choice axis (as in Fig. 3 main manuscript). Next:  
 114 discriminability with a new axis enforced to be orthogonal to attention, movement, saccades, and stimulus  
 115 axis respectively. **b**, As in **a**, but for the movement axis. In all panels, a dot indicates one animal; the  
 116 middle bar and shaded area are the average across animals and 95% CI ( $n = 7$  animals).

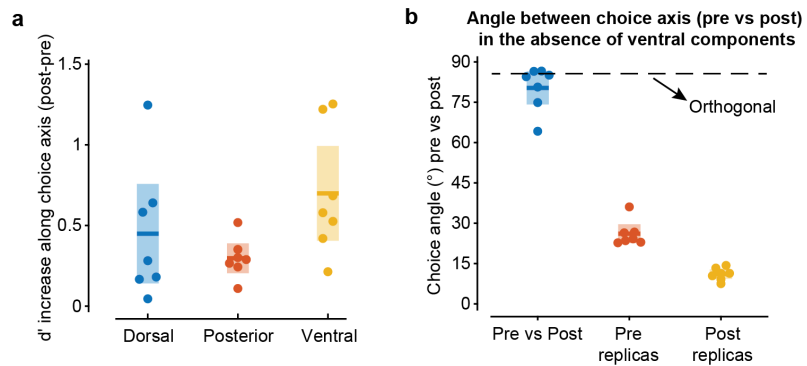

117

118 **Supplementary Figure 14 | a**, Average  $d'$  increase in choice discriminability from pre-movement to post-  
 119 movement axes along the higher visual areas.  $d'$  increase in the ventral areas ranked significantly as the  
 120 largest (5 out of 7 animals) at the 95% CI level. Rank significance was computed from 10,000 bootstrapped  
 121 samples of the same  $d'$  increase-values, randomly permuted across the areas. **b**, Angle between the state  
 122 axes for choice (pre- and post-movement) defined without any of the locaNMF components from area L  
 123 (ventral areas). The angle resulting from the same state axes defined across different replicas (folds in the  
 124 cross-validation procedure) are also shown for comparison for both pre- and post-movement axes.  
 125 Dashed line: average angle for orthogonal axes (85.5°, obtained by resampling the components in one of  
 126 the axes). In all panels, a dot indicates one animal; the middle bar and shaded area are the average across  
 127 animals and 95% CI (n = 7 animals).

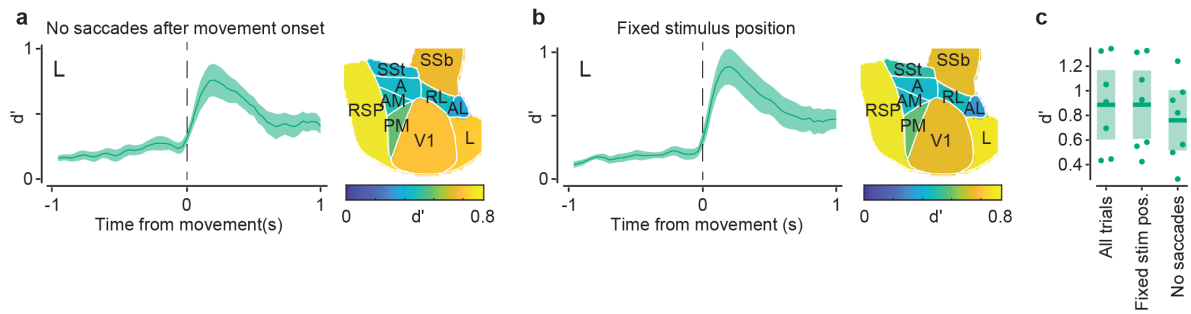

128

129 **Supplementary Figure 15 | a**, Ventral stream choice signature is not linked to eye or stimulus movements.

130 Evolution of choice  $d'$  for area L during trials where the first movement occurred within 1 s of the stimulus

131 presentation, i.e., the stimulus was always in the same position on the screen. Right: area-specific  $d'$  0.2 s

132 after movement for the same trials. **b**, As in **a**, but also with the constraint that there were no saccades

133 0.5 s before or after the movement onset. For  $d'$  trajectories: line for mean across animals and shaded

134 area for its s.e. ( $n = 7$ ).

135 **c**, Comparison of peak  $d'$  values in area L for the three controlled conditions: all

136 trials (same as Fig. 3 on the main text), and those shown here in panels **a**, and **b**. In all panels, a dot

137 indicates one animal; the middle bar and shaded area are the average across animals and 95% CI ( $n = 7$

animals).

| Reference                             | Type                                                                     | Task related |          | Choice related                              |                                                                   |           |                                                    |         | Notes                                                                                                                               |
|---------------------------------------|--------------------------------------------------------------------------|--------------|----------|---------------------------------------------|-------------------------------------------------------------------|-----------|----------------------------------------------------|---------|-------------------------------------------------------------------------------------------------------------------------------------|
|                                       |                                                                          | Memory       | Evidence | Regions & resolution                        | Choice assesment                                                  | Causality | Choice regions                                     | Species |                                                                                                                                     |
| 1 Zatzka-Haas et al., bioRxiv 2021    | HF, 2AFC VIS contrast discrimination                                     | X            | St       | Neuropixel + whole cortex widefield         | Binary decoder, pre-motor sensitivity                             | ✓         | Rare, mostly in MOs                                | MOU     | Choice as action selection; perhaps task driven by basal ganglia, SC, and zona incerta                                              |
| 2 Orsolic et al., Neuron 2021         | HF, go-nogo, speed change VIS detection task                             | X            | St       | Whole cortex widefield, 2P in MOs           | n/a, but see 'temporal expectation'                               | X         | n/a                                                | MOU     | MOs and MOp responded to pro-licking stimulus fluctuations when speed change was likely                                             |
| 3 Osako et al., Curr. Biol. 2021      | FM, 3-choice VIS detection task + 2AFC detection                         | X            | St       | Tetrods in PPC and V1                       | d-prime, distance of projections onto activity modes, SVM decoder | X         | PPC & V1                                           | RAT     | No explicit left-right choice encoding                                                                                              |
| 4 Lee et al., bioRxiv 2020            | HF, 2AFC VIS T-maze + wheel task                                         | X            | St       | PPC, 2P                                     | ccCP                                                              | X         | PPC                                                | MOU     | Different motor actions for choice across tasks; choice encoding in T-maze, rarer in wheel task                                     |
| 5 Tang & Higley, Neuron 2020          | HF, visually cued, eyeblink conditioning tasks                           | X            | St       | V1 L5, 2P                                   | Logistic regression (prior blink)                                 | ✓         | V1                                                 | MOU     | CPs responses more predictive than CSt and causally needed for performance                                                          |
| 6 Salkoff et al., Cerebral Crtx. 2020 | HF, go-nogo VIS (LED flash) task                                         | X            | St       | Whole cortex widefield, ePhys               | auROC                                                             | ✓         | MOs                                                | MOU     | Response ↑ in visual and somatosensory cortex in pretrial times with misses                                                         |
| 7 Puscian et al., Cell Rep. 2020      | HF, visually cued, eyeblink conditioning tasks                           | X            | St       | V1, 2P                                      | Linear classifier to predict blinks                               | X         | V1                                                 | MOU     | Prediction accuracy stronger in late training phase, in pyramidal and PV                                                            |
| 8 Kauvar et al., Neuron 2020          | HF, 3-option lick, go-nogo history-guided odor task                      | ✓            | St       | All cortex COSMOS imaging (1-15 cells)      | PLS-based decoder                                                 | ✓         | Distrubted, also V1                                | MOU     | Videography predics motor action in pre-odor periods                                                                                |
| 9 Koay et al., eLife 2020             | HF, VIS T-maze delayed 2AFC navigation task                              | ✓            | PI       | Visual-parietal cortex and RSC, 2P ROIs     | SVM decoder on regressive model, corrected by view angle          | X         | Gradients (V1 the least)                           | MOU     | Uncorrelated mode analysis to isolate choice from motor; focus on small sample of cue-locked cells                                  |
| 10 Koay et al., bioRxiv 2019          | HF, VIS T-maze delayed 2AFC navigation task                              | ✓            | PI       | Visual-parietal cortex and RSC, 2P ROIs     | Two-sample t-test in active periods                               | X         | Uniformly distributed                              | MOU     | Multiplicative neural sequences for efficient coding                                                                                |
| 11 Minderer et al., Neuron 2019       | HF, locomotion with VIS optic flow in VR ("distance" task)               | X            | St       | Widefield, 2P, dorsal parietal cortex, RSC  | Not examined                                                      | ✓         | n/a                                                | MOU     | Opto Inhibition at widefield level: visual, parietal, RSC                                                                           |
| 12 Musall et al., Nat. Neurosci. 2019 | HF, delayed, 2AFC VIS spatial discrimination (1s delay) task, VIS or AUD | ✓            | PI       | Widefield whole cortex, 2P, Neuropixel      | Regressive model, not pre-motor sensitive                         | X         | ALM(?)                                             | MOU     | Unclear which region weighed choice the most                                                                                        |
| 13 Zhong et al., Nat. Neurosci. 2019  | HF, 2AFC AUD licking task                                                | X            | St       | PPC, A1                                     | ROC, linear classifier                                            | ✓         | PPC                                                | MOU     | PPC↓ affected new stims & recategorization, not familiar ones, and reduced hist. biases                                             |
| 14 Pinto et al., Neuron 2019          | HF, three 2AFC VIS navigation tasks                                      | ✓            | PI & St  | Widefield whole cortex                      | Pixel & area based decoder, with view-angle info                  | ✓         | Posterior to frontal gradient in decoding accuracy | MOU     | Inactivation effects task complexity; distributed nets necessary for memory and accumulation tasks; only VIS-PPC in visually guided |
| 15 Steinmetz et al., Nature 2019      | HF, 2AFC VIS contrast discrimination                                     | X            | St       | Neuropixel, whole brain                     | Regressive model, ccCP, pre-motor sensitivity                     | X         | Rare, in forebrain (MOs, PL, MOp) BG, SCm, hTH     | MOU     | Vertical Neuropixel penetration in cortex                                                                                           |
| 16 Pho et al., Nat. Comms. 2018       | HF, go-nogo (licking) VIS task                                           | X            | St       | V1, PPC, 2P                                 | Time-dependent ROC, FA vs CR                                      | ✓         | PPC                                                | MOU     | Reversed sensorymotor contingency                                                                                                   |
| 17 Odoemene et al., J. Neurosci. 2018 | FM, 2AFC VIS ligh flashes accumulation task                              | X            | Pt       | Visual areas, widefield                     | n/a                                                               | ✓         | n/a                                                | MOU     | Early flashes larger weights similar to mokeys but not rats; AM inactivation biases decision                                        |
| 18 Akrami et al., Nature 2018         | FM, 2AFC AUD discrimination (louder)                                     | ✓            | St       | PPC, ePhys                                  | Mutual information                                                | ✓         | PPC                                                | RAT     | Performance ↑ with reduction of history bias (but ↓when bias helped)                                                                |
| 19 Gilad et al., Neuron 2018          | HF, tactile go-nogo texture discrimination                               | ✓            | St       | Widefiled whole cortex & 2P in S1,2 RL, PPC | SVM Hit vs CR                                                     | ✓         | S1, S2, RL                                         | MOU     | Short-term memory: M2 future actions, P past stims.                                                                                 |
| 20 Krumin et al., eLife 2018          | HF, 2AFC VIS contrast-detection navigation task                          | X            | St       | PPC, 2P                                     | Local likelihood method                                           | X         | n/a                                                | MOU     | Heading and position explains decision                                                                                              |
| 21 Licata et al., J. Neurosci. 2017   | HF, delayed, rate discrimination task, VIS or AUD                        | X            | PI       | PPC, ePhys                                  | Regressive model for inactivation; MI for neural                  | ✓         | PPC                                                | RAT     | PPC↓ spares auditory but not visual decisions                                                                                       |



| Reference                                 | Type                                                       | Task related |          | Choice related                                        |                                                    |           |                        |         |                                                                                                         | Notes |
|-------------------------------------------|------------------------------------------------------------|--------------|----------|-------------------------------------------------------|----------------------------------------------------|-----------|------------------------|---------|---------------------------------------------------------------------------------------------------------|-------|
|                                           |                                                            | Memory       | Evidence | Regions & resolution                                  | Choice assesment                                   | Causality | Choice regions         | Species |                                                                                                         |       |
| 22 Driscoll et al., Cell 2017             | HF 2AFC VIS T-maze navigation task                         | ✓            | St       | PPC, 2P                                               | GLM and C-SVC                                      | ✓         | PPC                    | MOU     | PPC↓ most effective during cue period                                                                   |       |
| 23 Scott et al., Neuron 2017              | HF, 2AFC VIS discrimination                                | ✓, X         | Pt       | PPC, FOF, mV2, 2P, ePhys                              | SVM decoder                                        | X         | FOF                    | RAT     | Heterogeneous dynamics in response to individual pulses as a 'temporal basis' for evidence accumulation |       |
| 24 Hwang et al., Nature Comms. 2017       | 2AFC VIS discrimination                                    | ✓            | St       | PPC, 2P                                               | auROC, linear classifier                           | ✓         | PPC                    | MOU     | Action-selection history bias in PPC; PPC↓ no effects after stim-on                                     |       |
| 25 Chen et al., Neuron 2017               | 2AFC tactile licking task                                  | ✓            | St       | ALM, MM, 2P, ePhys                                    | Regressive model                                   | X         | ALM                    | MOU     | Directional activity 1st in deep ALM, secs before movement                                              |       |
| 26 Allen et al., Neuron 2017              | HF, olfactory go-nogo                                      | X            | St       | Whole cortex multi-ROI 2P                             | ROC + GLM, not pre-motor sensitive                 | ✓         | Unspecific cortex-wide | MOU     | M2↓ no global activity ramps; single regions are necessary for global patterns (behavior)               |       |
| 27 Yang et al., Nat. Neurosci. 2016       | HF, go-nogo tactile detection task                         | X            | St       | 2P and intracellular in S1, recording in thalamus, S2 | Detection probability, not pre-motor sensitive     | X         | S1                     | MOU     | Choice carried by top-down axons from secondary somatosensory cortex                                    |       |
| 28 Kwon et al., Nat. Neurosci. 2016       | HF, go-nogo tactile detection task                         | X            | St       | 2P, S1 & S2                                           | auROC                                              | ✓         | S2 (&S1)               | MOU     | S2 more associated to perceptual outcome than S1                                                        |       |
| 29 Goard et al., eLife 2016               | HF, VIS go-nogo licking VIS task                           | ✓            | St       | V1, PPC, fMC, 2P                                      | auROC and regression                               | ✓         | PPC fMC                | MOU     | PPC↓ in response period or delay after stimulus does not affect behavior (fMC↓ does - memory)           |       |
| 30 Morcos & Harvey, Nat. Neurosci. 2016   | HF, 2AFC VIS T-maze navigation                             | X            | PI       | PPC, 2P                                               | SVM                                                | X         | PPC                    | MOU     |                                                                                                         |       |
| 31 Funamizu et al., Nat. Neurosci. 2016   | HF, auditory VR navigation (reach goal location)           | ✓            | St & PI  | PPC, PM, 2P                                           | t-test and linear regression                       | ✓         | PPC                    | MOU     | Interpreting "goal aligned" as choice related                                                           |       |
| 32 Poort et al., Neuron 2015              | HF, go-nogo VIS & olfactory discrimination with navigation | X            | St       | V1, 2P                                                | Cumulative decoder                                 | ✓         | V1                     | MOU     | Choice in cells tuned to rewarded stimuli (reward expectation?)                                         |       |
| 33 Erlich et al., eLife 2015              | FM, 2AFC AUD task                                          | X            | PI       | PPC, FOF, Behavior                                    | Behavioral                                         | ✓         | FOF, PPC               | RAT     | PPC↓ no effect on choice driven by sound, but impairs 'internal' decisions                              |       |
| 34 Hanks et al., Nature 2015              | FM, 2AFC AUD discrimination                                | X            | PI       | PPC, FOF, ePhys                                       | ROC                                                | ✓         | FOF                    | RAT     | FOF↓ has effects if at stimulus end; PPC↓ no effect                                                     |       |
| 35 Guo et al., Neuron 2014                | HF, 2AFC pole detection task                               | ✓            | St       | S1, ALM, ePhys                                        | Spike count (t-test)                               | ✓         | ALM                    | MOU     | Widefield opto-inactivation                                                                             |       |
| 36 Raposo et al., Nat. Neurosci. 2014     | FM, 2AFC VIS and AUD clicks                                | X            | PI & St  | PPC, ePhys                                            | ROC, choice divergence and preference; SVM decoder | ✓         | PPC                    | RAT     | All-session inactivation affected VIS not AUD                                                           |       |
| 37 Harvey et al., Nature 2012             | HF, VIS T-maze navigation                                  | ✓            | St       | PPC, 2P, ePhys                                        | Trajectory selectivity index                       | ✓         | PPC                    | MOU     | PPC↓ affects memory guided task                                                                         |       |
| 38 Erlich et al., Neuron 2011             | FM, 2AFC AUD                                               | ✓            | St       | FOF, ePhys                                            | ROC                                                | ✓         | FOF                    | MOU     | Head angle did not explain FOF delay period rates predicting orienting choice                           |       |
| 39 Jaramillo & Zador, Nat. neurosci. 2011 | HF, 2AFC AUD task                                          | X            | St       | AC, ePhys                                             | n/a, but see 'temporal expectation'                | ✓         | AC                     | MOU     |                                                                                                         |       |

St = static; PI = pulsatile; HF = head fixed; FM = freely moving; MOU = mouse; VIS = visual; AUD = auditory; 2P = two photon imaging; ePhys = electrophysiology; SVM = support vector machine; ROC = receiver operating characteristic; ccCP = combined conditions choice probability; GLM = generalized linear model; CR = correct rejections; C-SVC = C-support vector classification; PLS = partial least square regression; MI = mutual information; ↓↑ = decreased/increased activations.

PPC = posterior parietal cortex; V1 = primary visual cortex; S1 = primary somatosensory cortex; MO<sub>s</sub> = secondary motor cortex (M2); MO<sub>p</sub> = primary motor cortex (M1); ALM = anterolateral motor cortex; SC = superior colliculus; SC<sub>m</sub> = medial part of SC; RSC = retrosplenial cortex; FOF = frontal orienting field; MM = medial motor cortex; AM = anteromedial visual cortex; AC = auditory cortex; A1 = primary auditory cortex; BG = basal ganglia; hTH = high-order thalamus; P = posterolateral visual area; CPn = corticopontine; CSt = corticostriatal; fMC = frontal motor cortex; mV2 = medial secondary visual cortex; RL = rostrolateral posterior parietal cortex; PL = prelimbic area; L5 = layer 5.

**Supplementary Table 1** | Summary of recent rodent studies focused on choice signals. Listed works focus primarily on the posterior cortex, with a few examining fronto-parietal or whole-cortex networks. This table reflects the authors' selection of a limited number of studies judged as particularly relevant for this work.

**Supplementary Table 2 | Trial conditions and number of trials used to obtain the different state axis used throughout the text.**

| <i>State axis definition<br/>(maximize discriminability<br/>between trial sets A and B)</i> | <i>Trial set A (avg num of<br/>trials per animal)</i>                                                                                                                      | <i>Trial set B (avg num of<br/>trials per animal)</i>                                                                                                                         | <i>Notes</i>                                                                                                          |
|---------------------------------------------------------------------------------------------|----------------------------------------------------------------------------------------------------------------------------------------------------------------------------|-------------------------------------------------------------------------------------------------------------------------------------------------------------------------------|-----------------------------------------------------------------------------------------------------------------------|
| <b>Stimulus</b>                                                                             | Stimulus present (2730)                                                                                                                                                    | No stimulus present (2730)                                                                                                                                                    | Number of no stimulus conditions chosen to match the number of stimulus (randomly chosen)                             |
| <b>Wheel movements</b>                                                                      | Trials with a wheel movement (left or right) after the stimulus, without any other movements before the stimulus and without any saccades within 1s of the movement (1190) | Trials without a wheel movement (left or right) after the stimulus, without any other movements before the stimulus and without any saccades within 1s of the movement (1190) | Number of no wheel conditions chosen to match the number of stimulus (randomly chosen)                                |
| <b>Saccades</b>                                                                             | Trials with a saccade after the stimulus, without any other saccades before the stimulus and without any wheel movements within 1s of the movement (465)                   | Trials without a saccade after the stimulus, without any other saccades before the stimulus and without any wheel movements within 1s of the movement (465)                   | Number of no saccade conditions chosen to match the number of stimulus (randomly chosen)                              |
| <b>Sustained attention</b>                                                                  | Top 33 <sup>rd</sup> percentile of pupil area change trials (896)                                                                                                          | Bottom 33 <sup>rd</sup> percentile of pupil area change trials (896).                                                                                                         |                                                                                                                       |
| <b>Choice</b>                                                                               | Trials with a right choice during the closed loop (657)                                                                                                                    | Trials with a left choice during the closed loop (721)                                                                                                                        | Pre- and post- movement axes were defined at different time points within the trial (before and after movement onset) |
| <b>Attention on Corr. Trials</b>                                                            | Top 33 <sup>rd</sup> percentile of pupil area change trials that resulted in correct choices (668)                                                                         | Bottom 33 <sup>rd</sup> percentile of pupil area change trials that resulted in correct choices (592)                                                                         |                                                                                                                       |
| <b>Attention on Incor. Trials</b>                                                           | Top 33 <sup>rd</sup> percentile of pupil area change trials that resulted in incorrect choices (221)                                                                       | Bottom 33 <sup>rd</sup> percentile of pupil area change trials that resulted in incorrect choices (248)                                                                       |                                                                                                                       |
| <b>Choice with high attention and easy trials</b>                                           | Trials where the animal made a right choice during the closed loop on the top 33 <sup>rd</sup> percentile of pupil area change and with angle difference > 45 deg (142)    | Trials where the animal made a left choice during the closed loop on the top 33 <sup>rd</sup> percentile of pupil area change and with angle difference > 45 deg (127)        |                                                                                                                       |
| <b>Difficulty with high attention and hard trials</b>                                       | Trials where the animal made a right choice during the closed loop on the top 33 <sup>rd</sup> percentile of pupil area change and with angle difference < 45 deg (177)    | Trials where the animal made a left choice during the closed loop on the top 33 <sup>rd</sup> percentile of pupil area change and with angle difference < 45 deg (206)        |                                                                                                                       |
| <b>Contralateral stimulus information</b>                                                   | Left stimulus horizontal, angle difference = 90 deg and left choice (70)                                                                                                   | Left stimulus vertical, angle difference = 90 deg and left choice (70)                                                                                                        |                                                                                                                       |
